# Supplementary material for: Parallel SPR and QCM-D Quantitative Analysis of CD9, CD63, and CD81 Tetraspanins: A Simple and Sensitive Way to Determine the Concentration of Extracellular Vesicles Isolated from Human Lung Cancer Cells
Source: PubMed Central journal article supplement (PMC10308334; doi:10.1021/acs.analchem.3c00772), 2023-06-12
Supplement: ac3c00772_si_001.pdf [file ac3c00772_si_001.pdf]

# SUPPORTING INFORMATION

## **Parallel SPR and QCM-D quantitative analysis of CD9, CD63, and CD81 tetraspanins: a simple and sensitive way to determine the concentration of extracellular vesicles isolated from human lung cancer cells**

Agata Kowalczyk<sup>1,\*</sup>, Aleksandra Gajda-Walczak<sup>1</sup>, Monika Ruzycka-Ayoush<sup>2</sup>, Alicja Targonska<sup>3</sup>, Grazyna Mosieniak<sup>3</sup>, Maciej Glogowski<sup>4</sup>, Anna Szumera-Cieckiewicz<sup>5</sup>, Monika Prochorec-Sobieszek<sup>5</sup>, Magdalena Bamburowicz-Klimkowska<sup>2</sup>, Anna M. Nowicka<sup>1,\*</sup>, and Ireneusz P. Grudzinski<sup>2</sup>

<sup>1</sup>Department of Inorganic and Analytical Chemistry, Faculty of Chemistry, University of Warsaw, Pasteura Str. 1, PL-02-093, Warsaw, Poland

<sup>2</sup>Department of Toxicology and Food Science, Faculty of Pharmacy, Medical University of Warsaw, Banacha Str. 1, PL-02-097, Warsaw, Poland

<sup>3</sup>Laboratory of Molecular Bases of Ageing, Nencki Institute of Experimental Biology, Polish Academy of Sciences, Pasteura Str. 3, PL-02-093, Warsaw, Poland

<sup>4</sup>Department of Lung Cancer and Chest Tumors, Maria Sklodowska-Curie National Research Institute of Oncology, Roentgena Str. 5, PL-02-781, Warsaw, Poland

<sup>5</sup>Department of Cancer Pathomorphology, Maria Sklodowska-Curie National Research Institute of Oncology, Roentgena Str. 5, PL-02-781, Warsaw, Poland

\*Corresponding authors: akowalczyk@chem.uw.edu.pl (A.K.), anowicka@chem.uw.edu.pl (A.M.N.)

### A: anti-CD9

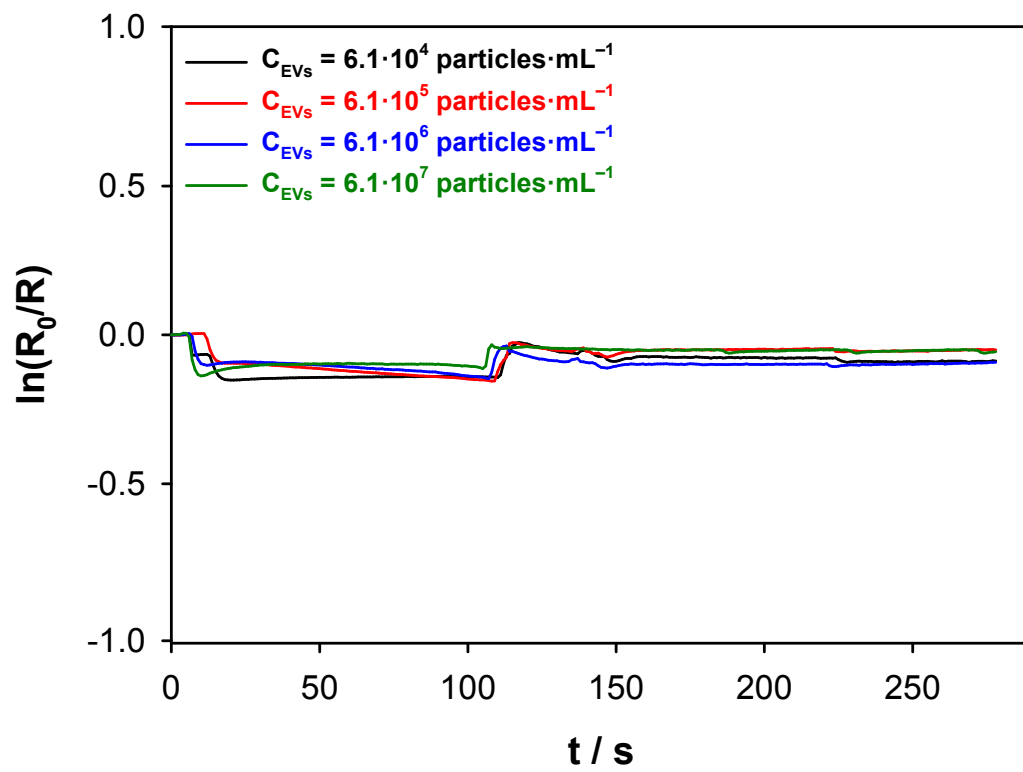

### B: anti-CD63

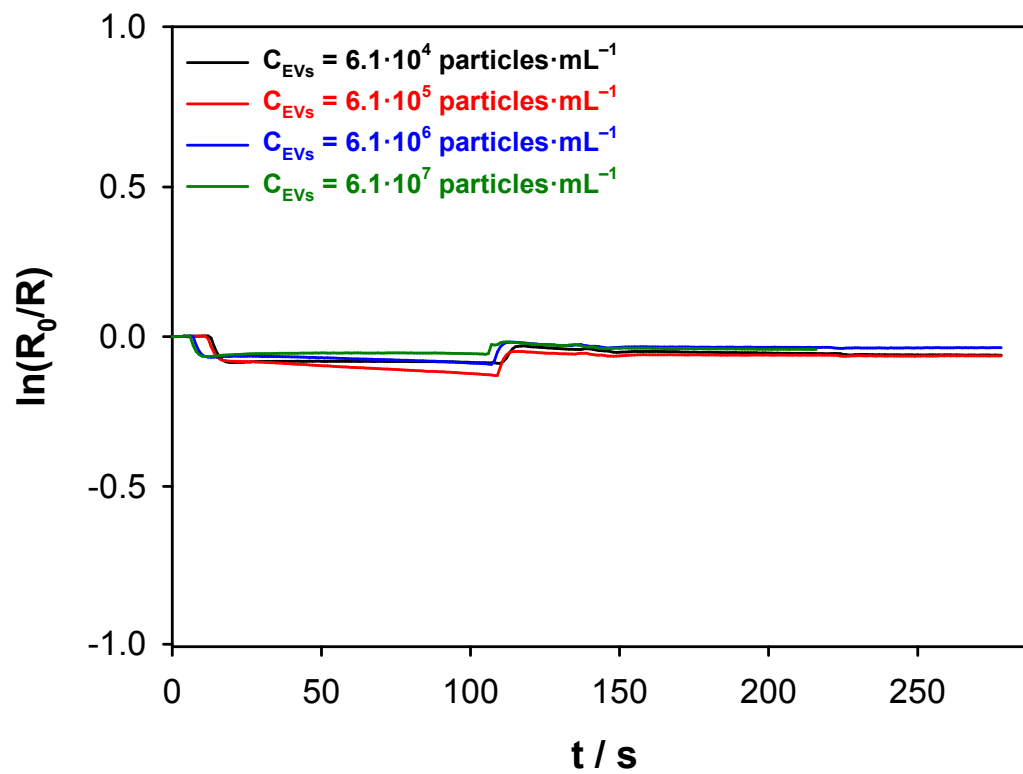

### C: anti-CD81

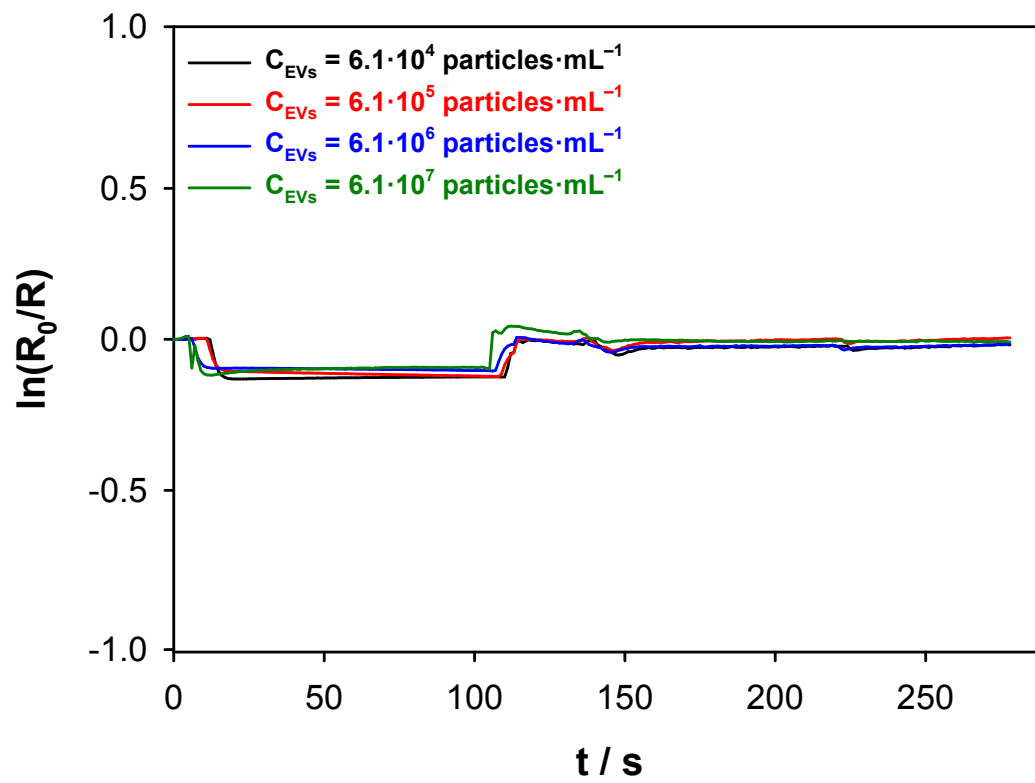

**Figure S1.** Dependencies of  $\ln(R_0/R) = f(t)$  during interaction of extracellular vesicles with anti-CD9 (A), anti-CD63 (B) and anti-CD81 (C).

**Table S1.** Analytical protocols for extracellular vesicles determination.

| Receptor layer                                                                                      | Method                                                | Dynamic range<br>[particles·mL <sup>-1</sup> ] | LOD<br>[particles·mL <sup>-1</sup> ]                                | Ref.      |
|-----------------------------------------------------------------------------------------------------|-------------------------------------------------------|------------------------------------------------|---------------------------------------------------------------------|-----------|
| Au/capture DNA/MCH/exosomes/CD 63 aptamer-T <sub>30</sub> -Au NPs/A <sub>30</sub> -Au NPs           | dual AuNP amplified SPR aptasensor                    | 0 – 1·10 <sup>9</sup>                          | 5·10 <sup>3</sup>                                                   | 1         |
| Au/CD63 aptamer/DNA-MB                                                                              | aptamer-based electrochemical (SWV) biosensor         | 1·10 <sup>6</sup> – 1·10 <sup>9</sup>          | 1·10 <sup>6</sup>                                                   | 2         |
| Au/anti-EpCAM aptamers/exosomes/ Ag NPs-anti-EpCAM an Cu NPs-anti-PSMA                              | electrochemical (LSV) sensor with metal nanoparticles | —                                              | 5·10 <sup>4</sup>                                                   | 3         |
| Au/DNA nanotetranedron/aptamer LZH8                                                                 | electrochemical (SWV) sensor with expanded nucleotide | 1·10 <sup>4</sup> – 1·10 <sup>13</sup>         | 2.1·10 <sup>4</sup>                                                 | 4         |
| Au/MUA/rabbit $\alpha$ -human CD9/exosomes/mouse $\alpha$ -human CD9/ $\alpha$ -mouse IgG/HRP---TMB | electrochemical (ChA)sandwich immunosensor            | 1·10 <sup>5</sup> – 1·10 <sup>11</sup>         | 2.1·10 <sup>5</sup>                                                 | 5         |
| Au/HS-PEG-biotin:HS-OEG-COOH/SAv/ biotin-anti-CD63                                                  | acoustic affinity immunosensor                        | 1·10 <sup>8</sup> – 5·10 <sup>10</sup>         | 2.9·10 <sup>8</sup>                                                 | 6         |
| Au/protein A/anti-CD9<br>Au/protein A/anti-CD63<br>Au/protein A/anti-CD81                           | SPR immunosensor                                      | 6.1·10 <sup>4</sup> – 6.1·10 <sup>7</sup>      | 7.8·10 <sup>3</sup><br>0.95·10 <sup>4</sup><br>2.5·10 <sup>4</sup>  | this work |
| Au/CSH/anti-CD9<br>Au/CSH/anti-CD63<br>Au/CSH/anti-CD81                                             | QCM-D immunosensor                                    | 6.1·10 <sup>4</sup> – 6.1·10 <sup>7</sup>      | 0.60·10 <sup>4</sup><br>1.8·10 <sup>4</sup><br>0.70·10 <sup>4</sup> | this work |

Ag NPs: silver nanoparticles; aptamer LZH8: aptamer for HepG2 hepatocellular exosomes; Au NPs: gold nanoparticles; ChA: chronoamperometry; CSH: cysteamine; Cu NPs: copper nanoparticles; EpCAM: epithelial cell adhesion molecule; HRP: horseradish peroxidase; LSV: linear scan voltammetry; MB: methylene blue, MCH: 6-mercapto-1-hexanol; MUA: 11-mercaptoundecanoic acid; OEG: oligo(ethylene glycol); PEG: polyethylene glycol; PSMA: prostate-specific membrane antigen; SAv: streptavidin; SPR: surface plasmon resonance; SWV: square wave voltammetry; TMB: 3,3',5,5'-tetramethyl benzidine.

## References

- (1) Wang, Q.; Zou, L.; Yang, X.; Liu, X.; Nie, W.; Zheng, Y.; Cheng, Q.; Wang, K. Direct Quantification of Cancerous Exosomes via Surface Plasmon Resonance with Dual Gold Nanoparticle-Assisted Signal Amplification. *Biosens. Bioelectron.* **2019**, *135*, 129-136.  
<https://doi.org/10.1016/j.bios.2019.04.013>
- (2) Zhou, Q.; Rahimian, A.; Son, K.; Shin, D. -S.; Patel, T.; Revzin, A. Development of an Aptasensor for Electrochemical Detection of Exosomes. *Methods* **2016**, *97*, 88-93.  
<https://doi.org/10.1016/j.ymeth.2015.10.012>
- (3) Zhou, Y. G.; Mohamadi, R. M.; Poudineh, M.; Kermanshah, L.; Ahmed, S.; Safaei, T. S.; Stojcic, J.; Nam, R. K.; Sargent, E. H.; Kelley, S. O. Interrogating Circulating Microsomes and Exosomes Using Metal Nanoparticles. *Small* **2016**, *12*, 727-732.  
<https://doi.org/10.1002/sml.201502365>
- (4) Wang, S.; Zhang, L.; Wan, S.; Cansiz, S.; Cui, C.; Liu, Y.; Wu, Y.; Dong, Y.; Tan, W. H. Aptasensor with Expanded Nucleotide Using DNA Nanotetrahedra for Electrochemical Detection of Cancerous Exosomes. *ACS Nano* **2017**, *11*, 3943-3949.  
<https://doi.org/10.1021/acsnano.7b00373>
- (5) Doldán, X.; Fagúndez, P.; Cayota, A.; Laíz, J.; Tosar, J. P. Electrochemical Sandwich Immunosensor for Determination of Exosomes Based on Surface Marker-Mediated Signal Amplification. *Anal. Chem.* **2016**, *88*, 10466-10473.  
<https://doi.org/10.1021/acs.analchem.6b02421>
- (6) Suthar, J.; Parsons, E. S.; Hoogenboom, B. W.; Williams, G. R.; Guldin, S. Acoustic Immunosensing of Exosomes Using a Quartz Crystal Microbalance with Dissipation Monitoring. *Anal. Chem.* **2020**, *92*, 4082-4093.  
<https://dx.doi.org/10.1021/acs.analchem.9b05736>
